# Supplementary material for: Structure-controlled CdS(0D, 1D, 2D) embedded onto 2D ZnS porous nanosheets for highly efficient photocatalytic hydrogen generation
Source: Royal Society of Chemistry journal article supplement (doi:10.1039/c7ra02565c), 2017-01-01
Supplement: c7ra02565c1.pdf [file c7ra02565c1.pdf]

**Structure-controlled CdS(0D,1D,2D) embedded onto 2D ZnS porous nanosheet for highly efficient photocatalytic hydrogen generation.**

Junmei Wang,<sup>a,b</sup> Zhijian Wang<sup>\*a</sup> Li Li, Jiazang Chen, Jianfeng Zheng, Suping Jia and Zhenping Zhu<sup>\*a</sup>

<sup>a</sup> State Key Laboratory of Coal Conversion, Institute of Coal Chemistry, Chinese Academy of Sciences, Taiyuan , 030001, P. R. China.

<sup>b</sup> University of Chinese Academy of Sciences , Beijing, 100049, P. R. China

\* Corresponding author. wangzhijian@sxicc.ac.cn, zpzh@sxicc.ac.cn

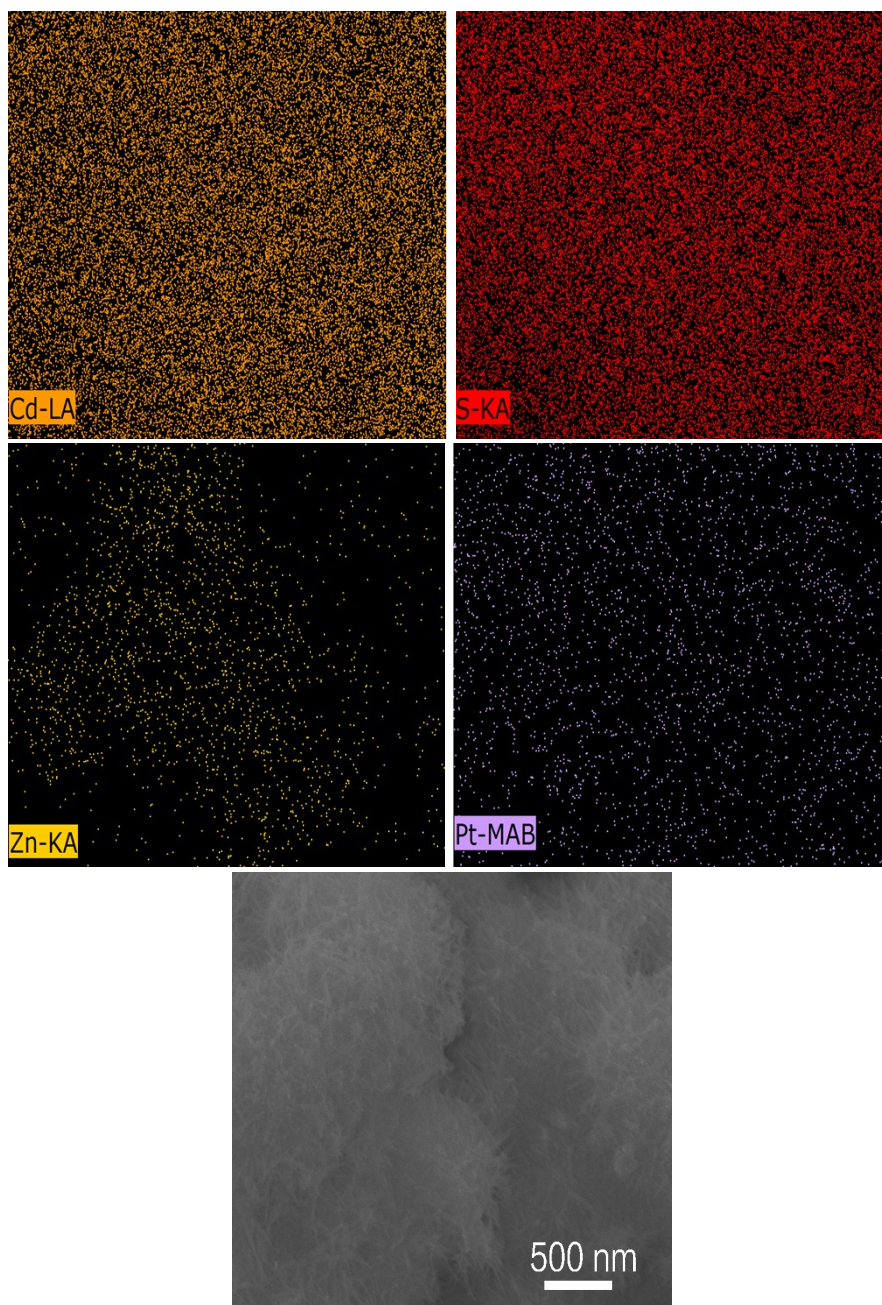

**Fig. S1** SEM image and corresponding EDX mapping of Pt-ZnS/CdS1D

**Table S1** Comparison of analytical structure and hydrogen generation rate of the Pt-ZnS/CdS composites

| Samples       | Surface area<br>( $\text{m}^2 \cdot \text{g}^{-1}$ ) | Band energy gap<br>(eV) | Configuration | $\text{H}_2$ generation rate<br>( $\text{mmol} \cdot \text{g}^{-1} \cdot \text{h}^{-1}$ ) |
|---------------|------------------------------------------------------|-------------------------|---------------|-------------------------------------------------------------------------------------------|
| Pt-ZnS/CdSQDs | 48                                                   | 2.45                    | 2D/0D         | 7.7                                                                                       |
| Pt-ZnS/CdS1D  | 65                                                   | 2.65                    | 2D/1D         | 26                                                                                        |
| Pt-ZnS/CdS2D  | 77                                                   | 2.69                    | 2D/2D         | 21                                                                                        |

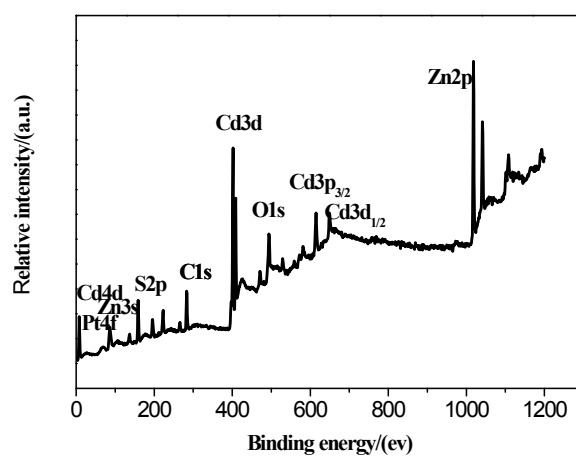

**Fig. S2** XPS survey spectra of Pt-ZnS/CdS 1D.

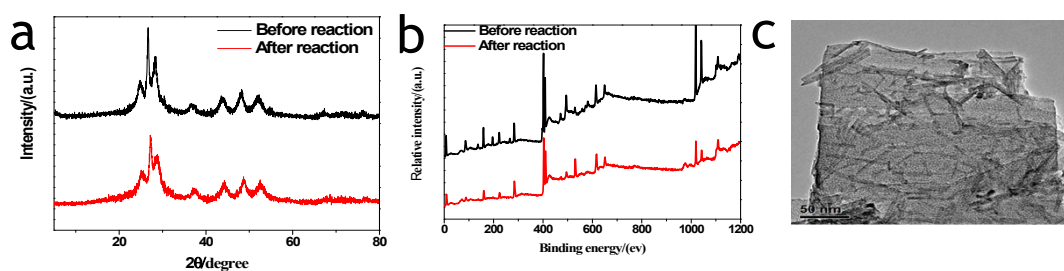

**Fig. S3** Comparing XRD (a), XPS (b) survey spectra and TEM image (c) of the Pt-ZnS/CdS1D before and after photocatalytic reaction

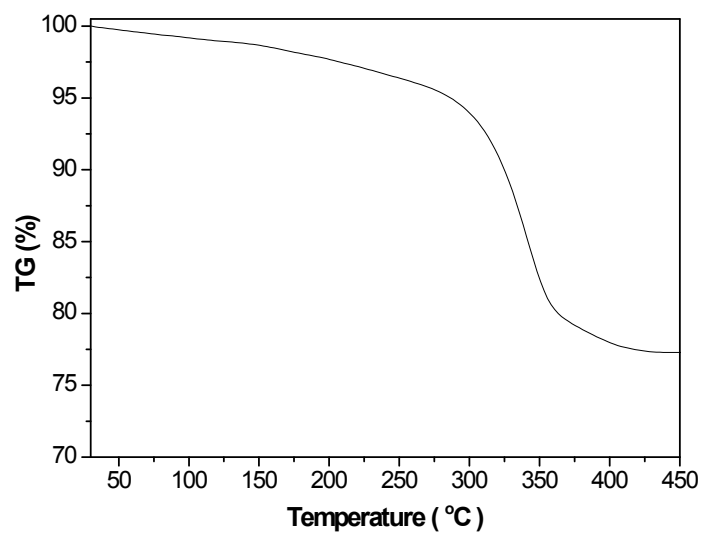

**Fig. S4** TG curves of Pt-ZnS/CdS1D

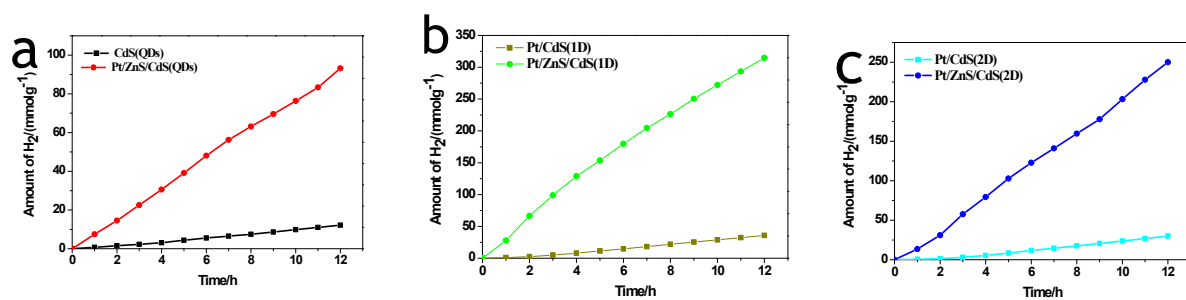

**Fig. S5** Comparison of the H<sub>2</sub> evolution activity of the Pt/CdS QDs and Pt-ZnS/CdS QDs; Pt/CdS 1D and Pt-ZnS/CdS 1D; Pt/CdS 2D and Pt-ZnS/CdS 2D respectively.
